# Supplementary material
Source: Springer Nature journal article supplement (https://www.springermedizin.de/resource/supplementary/12889_2010_2857_MOESM3_ESM.pdf/9487464)
Supplement: MOESM3 [file 9487464]

### **Physical violence by an intimate partner:**

- Was slapped or had something thrown at her that could hurt her
- Was pushed or shoved
- Was hit with fist or something else that could hurt
- Was kicked, dragged or beaten up
- Was choked or burnt on purpose
- Perpetrator threatened to use or actually used a gun, knife or weapon against her

### **Sexual violence by an intimate partner:**

- Was physically forced to have sexual intercourse when she did not want to
- Had sexual intercourse when she did not want to because she was afraid of what partner might do
- Was forced to do something sexual that she found degrading or humiliating

### **Physical and/or sexual violence by an intimate partner:**

- One or more of above acts of physical and/ or sexual violence
